# Supplementary material for: Conformation and Domain Movement Analysis of Human Matrix Metalloproteinase-2: Role of Associated Zn2+ and Ca2+ Ions
Source: PubMed Central journal article supplement (PMC6747341; doi:10.3390/ijms20174194), 2019-08-27
Supplement: ijms-20-04194-s001.pdf [file ijms-20-04194-s001.pdf]

# Supporting Information for: Conformation and Domain Movement Analysis of Human Matrix Metalloproteinase-2: role of associated Zn<sup>2+</sup> and Ca<sup>2+</sup> ions.

Leah Voit-Ostricki<sup>1</sup>, Sándor Lovas<sup>2</sup>, and Charles R. Watts<sup>1,3,\*</sup>

<sup>1</sup> Department of Neurosurgery, Mayo Clinic Health System-Franciscan Healthcare in La Crosse, Wisconsin, 54601, USA; [voitost.leah@gmail.com](mailto:voitost.leah@gmail.com)

<sup>2</sup> Department of Biomedical Sciences, Creighton University, Omaha, Nebraska, 68178, USA;  
[SandorLovas@creighton.edu](mailto:SandorLovas@creighton.edu)

<sup>3</sup> Department of Neurologic Surgery, Mayo Clinic, Rochester, Minnesota, 55905, USA;  
[charles.watts@parknicollet.com](mailto:charles.watts@parknicollet.com)

\* Correspondence: [charles.watts@parknicollet.com](mailto:charles.watts@parknicollet.com); Tel.: +1-952-993-3200, Fax: +1-952-993-7407

Received: date; Accepted: date; Published: date

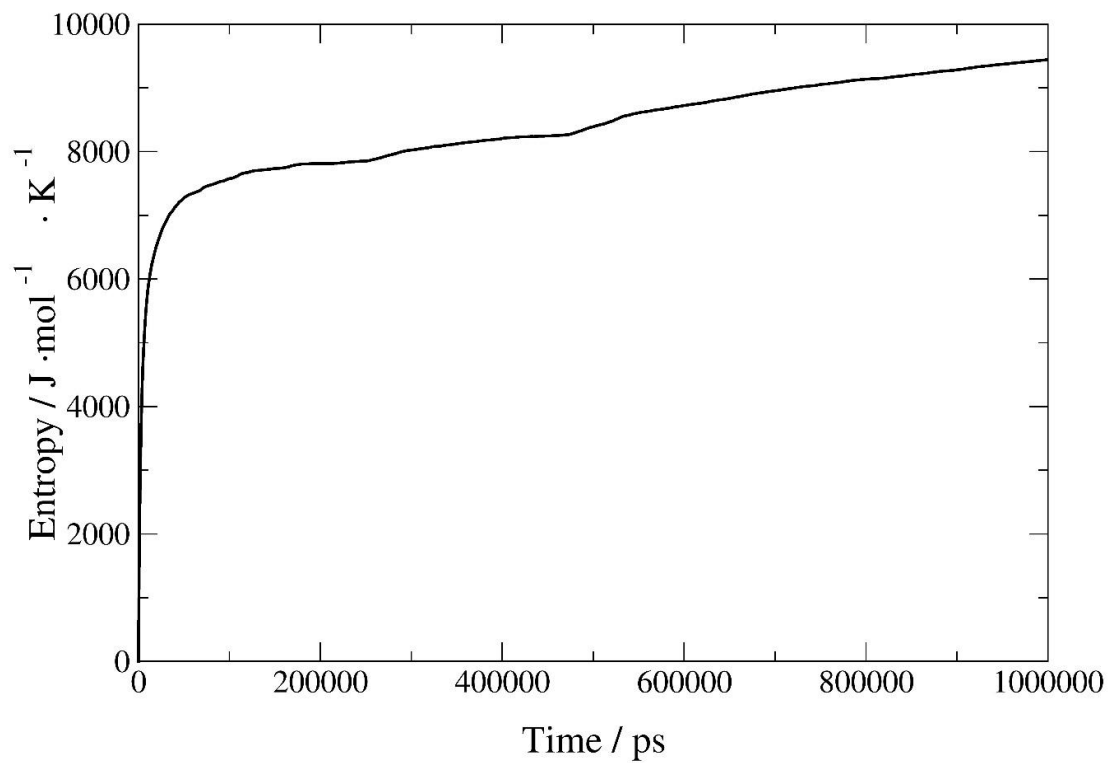

**Figure S1.** Configurational entropy of MMP-2 (calculated from the C $\alpha$ -trace, Zn<sup>2+</sup> and Ca<sup>2+</sup> coordinates) as a function of time, demonstrating the 200000 ps necessary for system equilibration.

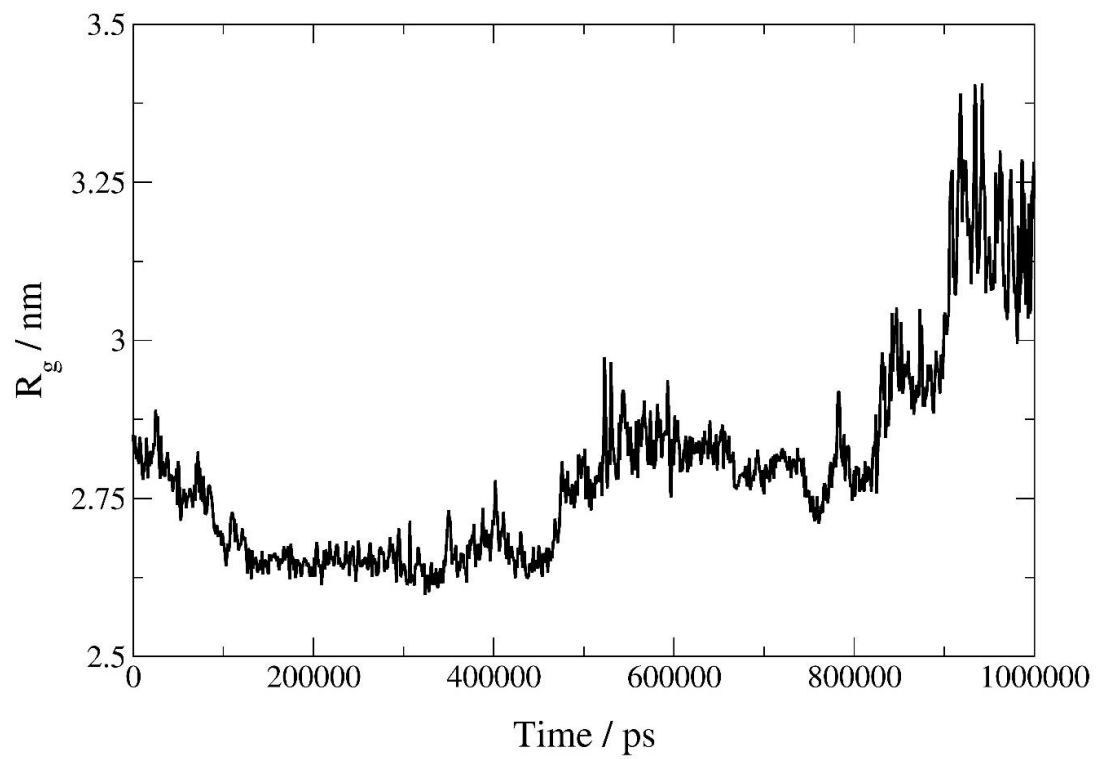

Figure S2. The radius of gyration ( $R_g$ ) as a function of time.

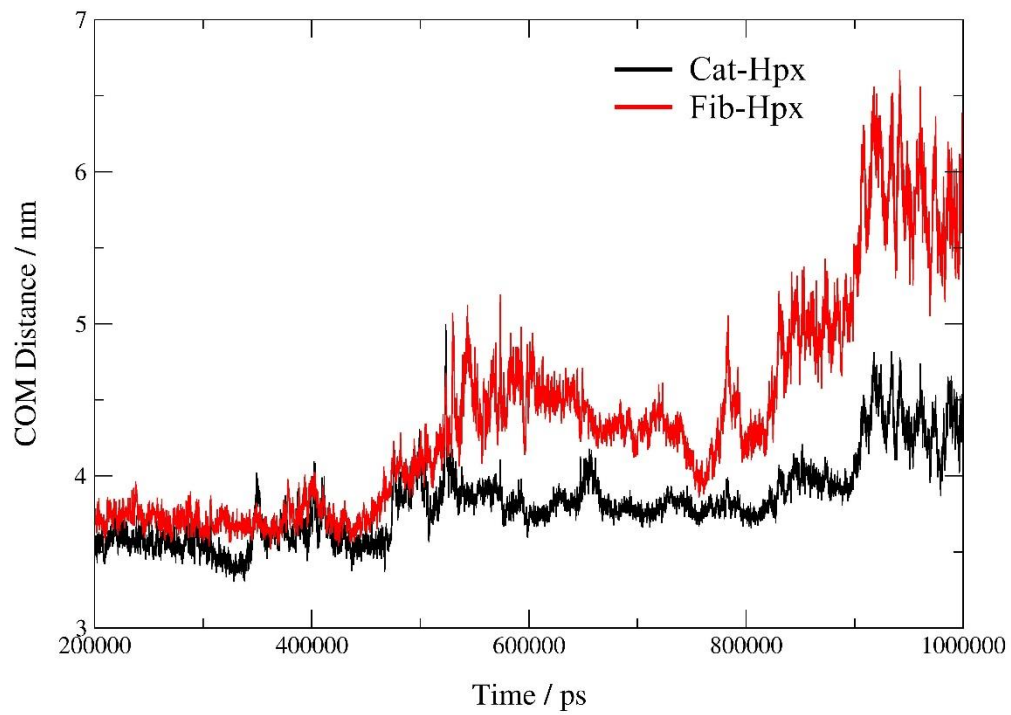

**Figure S3.** The Center of mass (COM) distance as a function of time between the Cat and Hpx (black) and Fib and Hpx (red) domains, respectively.

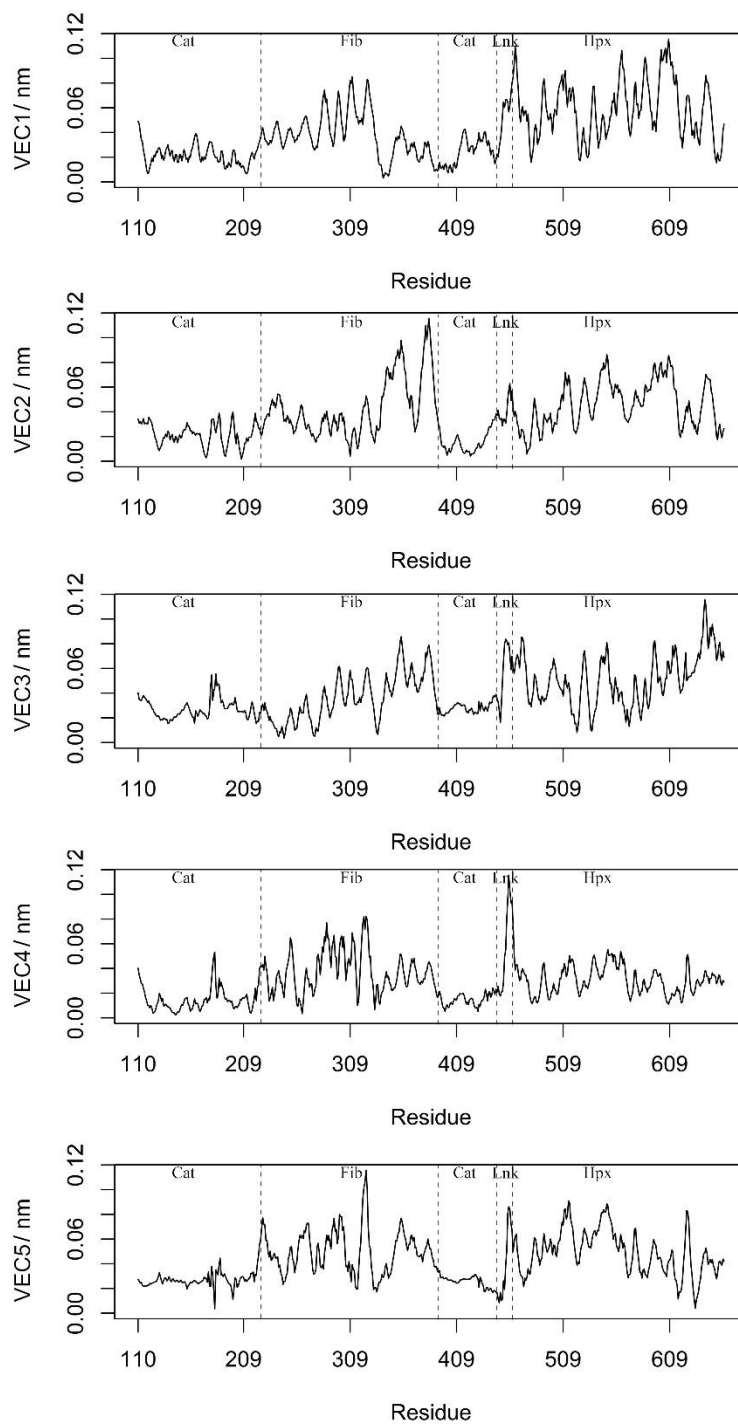

**Figure S4.**  $\alpha$ -trace RMSF plots of the top 5 eigenvectors.
